# Supplementary material for: Composition-Property Relationships of pH-Responsive Poly[(2-vinylpyridine)-co-(butyl methacrylate)] Copolymers for Reverse Enteric Coatings
Source: MDPI journal article supplement (doi:10.3390/pharmaceutics15020454), 2023-01-30
Supplement: s1 [file s1]

# Supplementary Materials: Composition-Property Relationships of pH-Responsive Poly[(2-vinylpyridine)-co-(butyl methacrylate)] Copolymers for Reverse Enteric Coatings

Kyle Brewer and Anton Blencowe

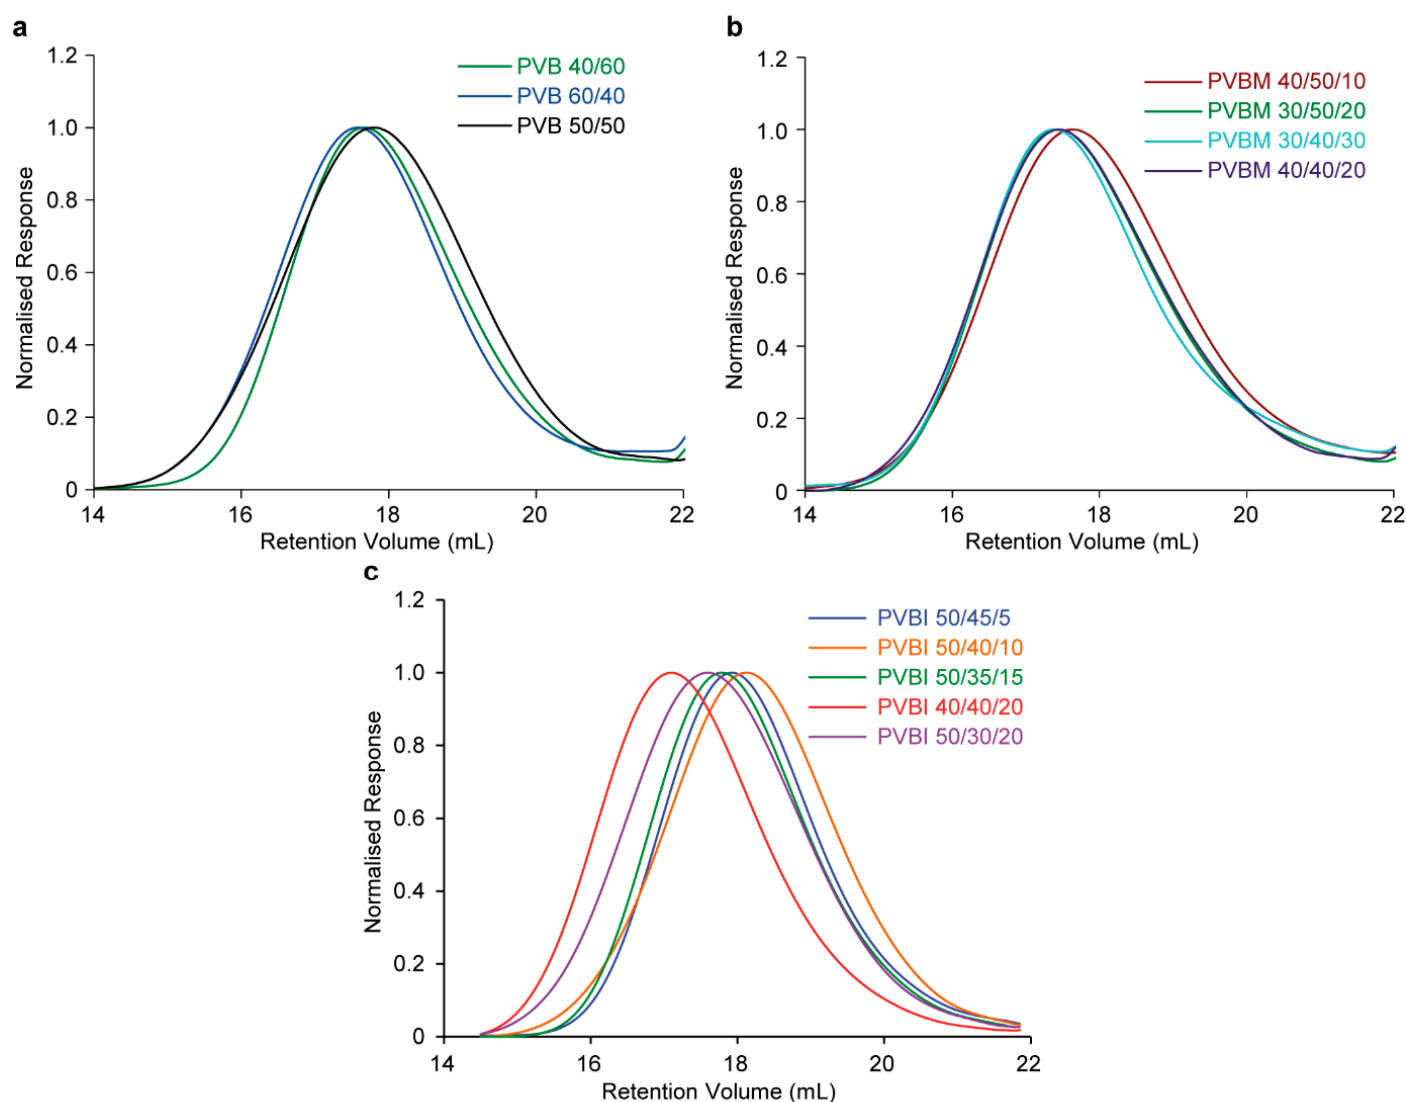

**Figure S1.** Normalised differential refractive index GPC chromatograms of the copolymer series.

**a**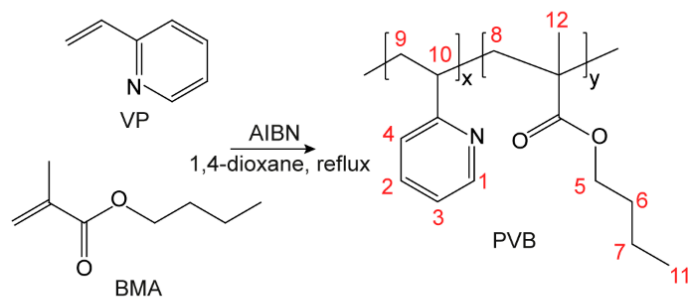**b**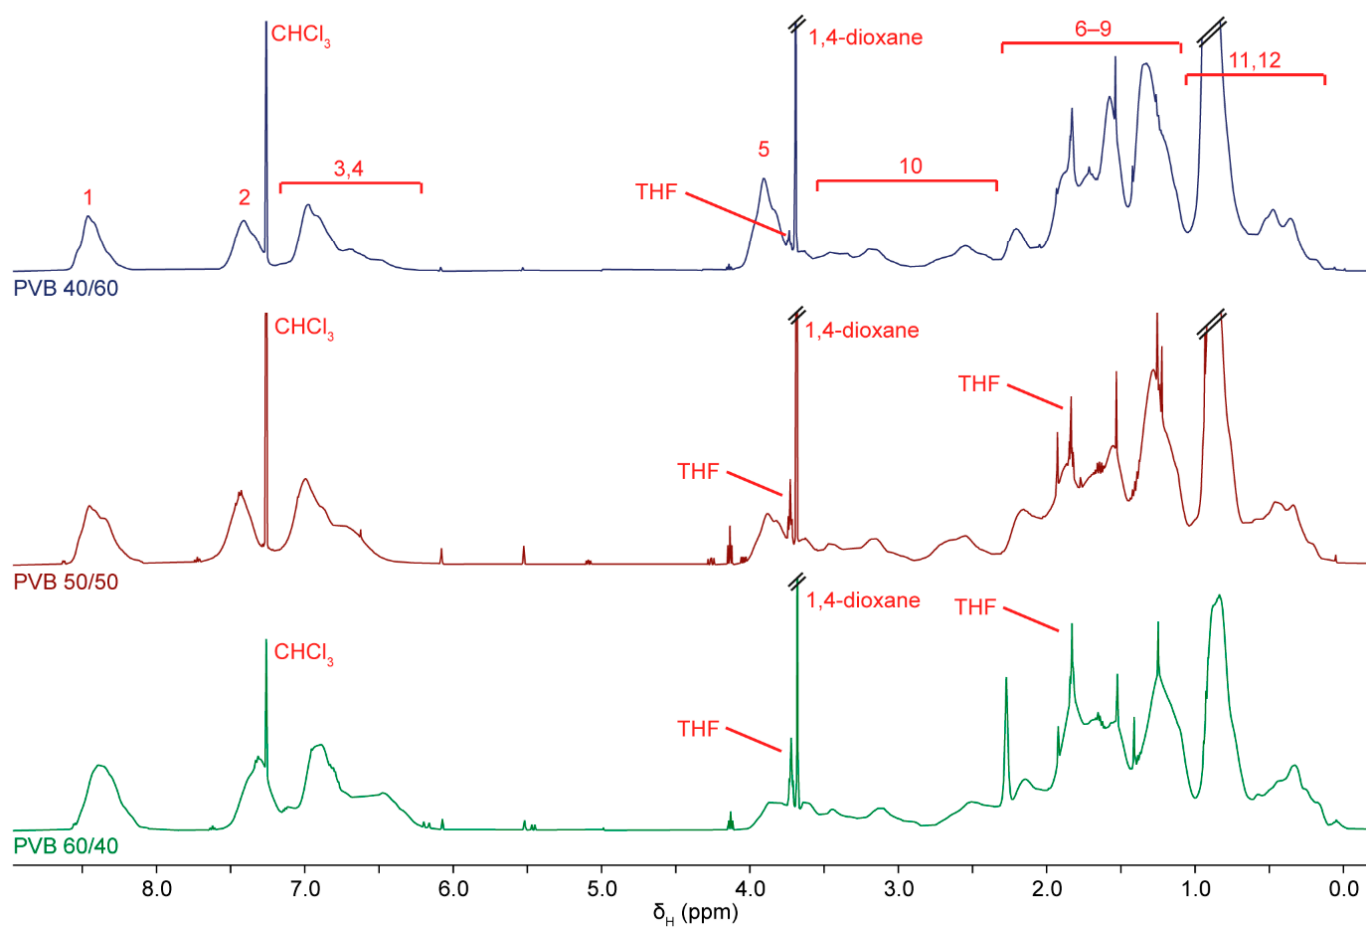

**Figure S2.** a) Scheme showing synthesis of PVB copolymers and b)  $^1\text{H}$  NMR spectra (600 MHz, 25  $^\circ\text{C}$ ,  $\text{CDCl}_3$ ) of the PVB series of copolymers.

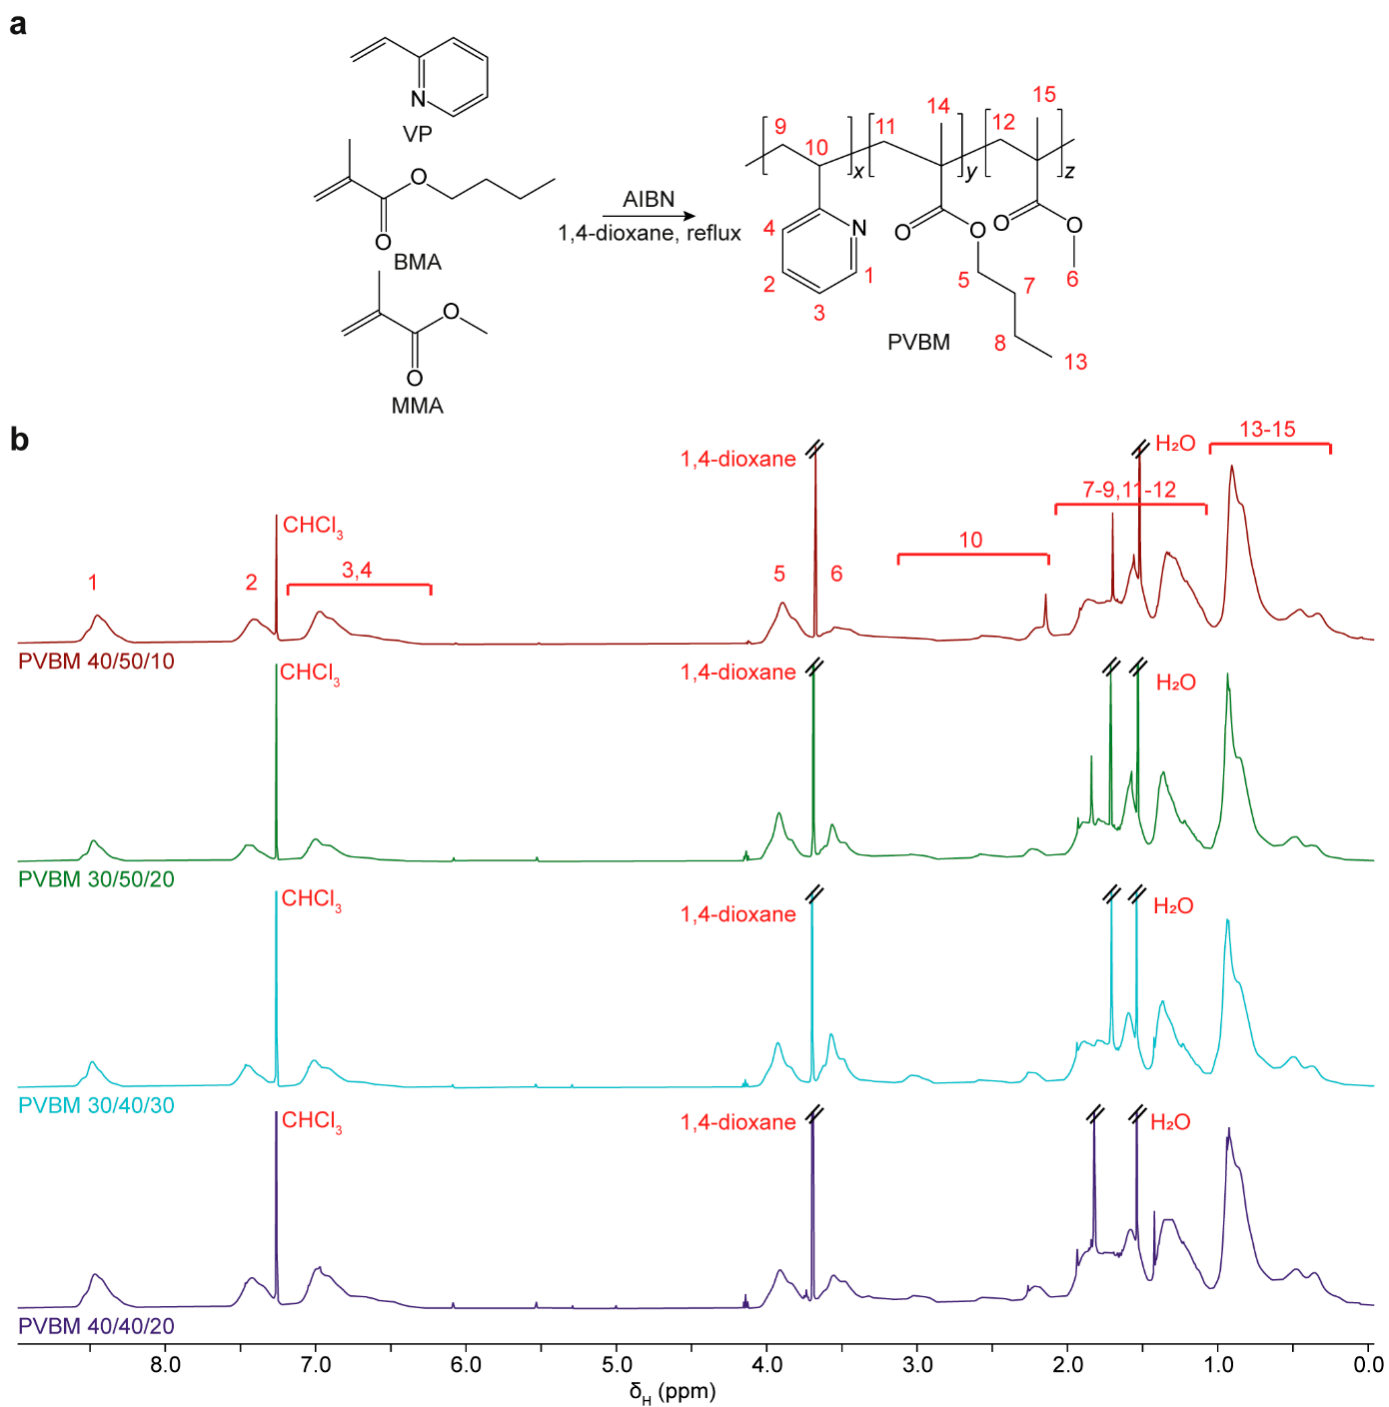

**Figure S3.** a) Scheme showing synthesis of PVBM copolymers and b)  $^1\text{H}$  NMR spectra (600 MHz, 25 °C,  $\text{CDCl}_3$ ) of the PVBM series of copolymers.

a

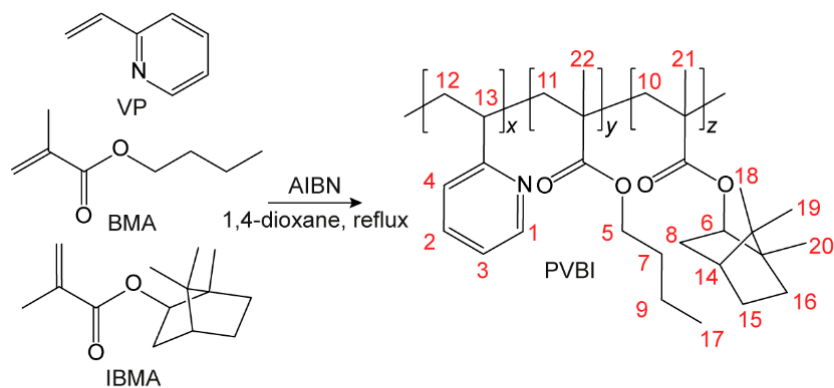

b

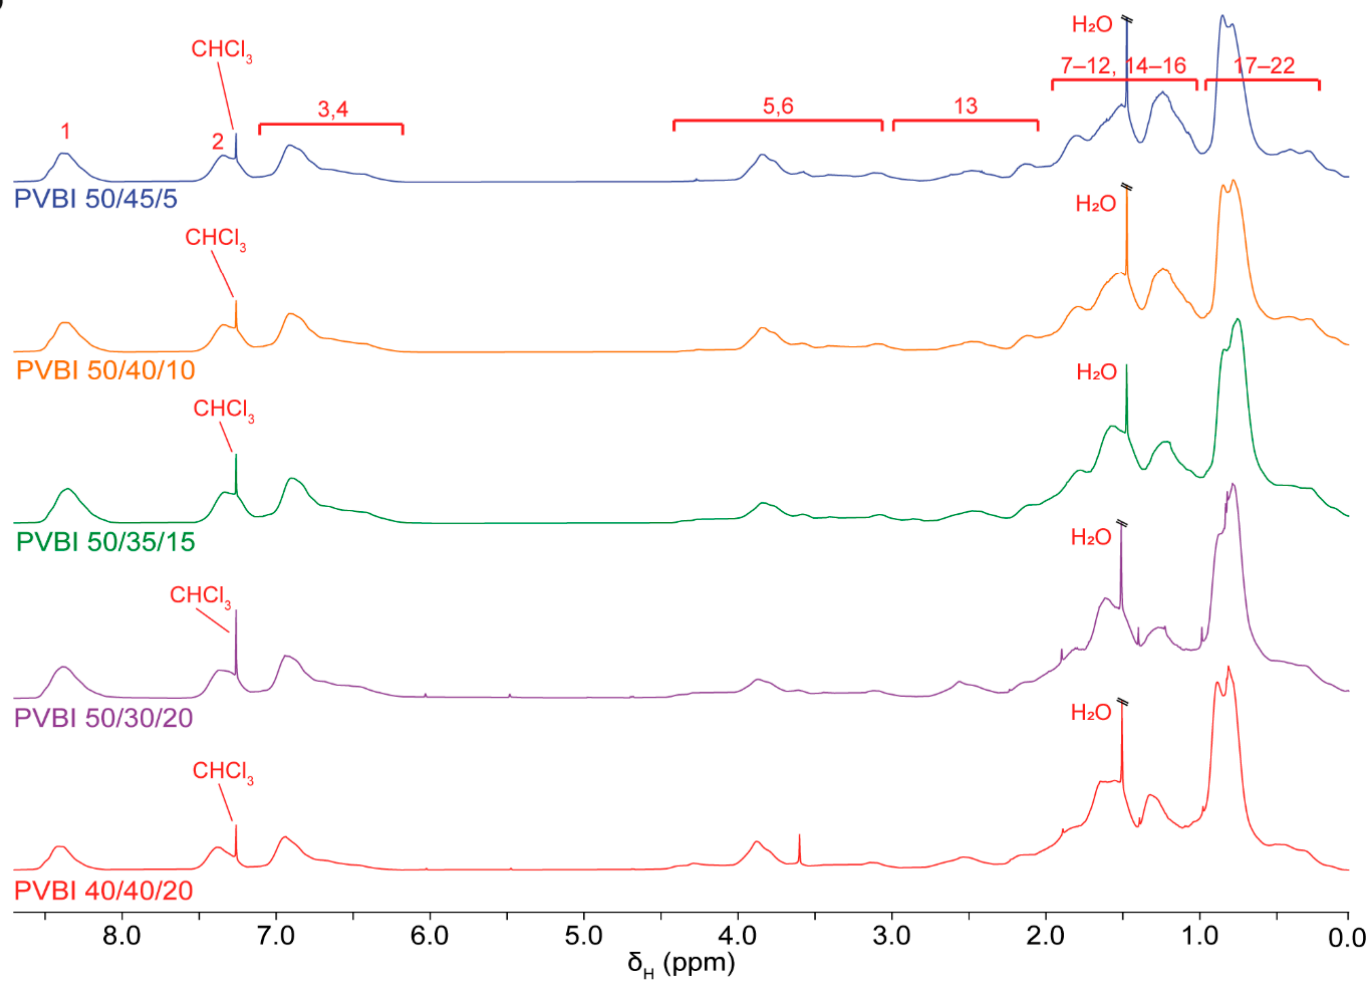

**Figure S4.** a) Scheme showing synthesis of PVBI copolymers and b)  $^1\text{H}$  NMR spectra (600 MHz, 25  $^\circ\text{C}$ ,  $\text{CDCl}_3$ ) of the PVBI series of copolymers.

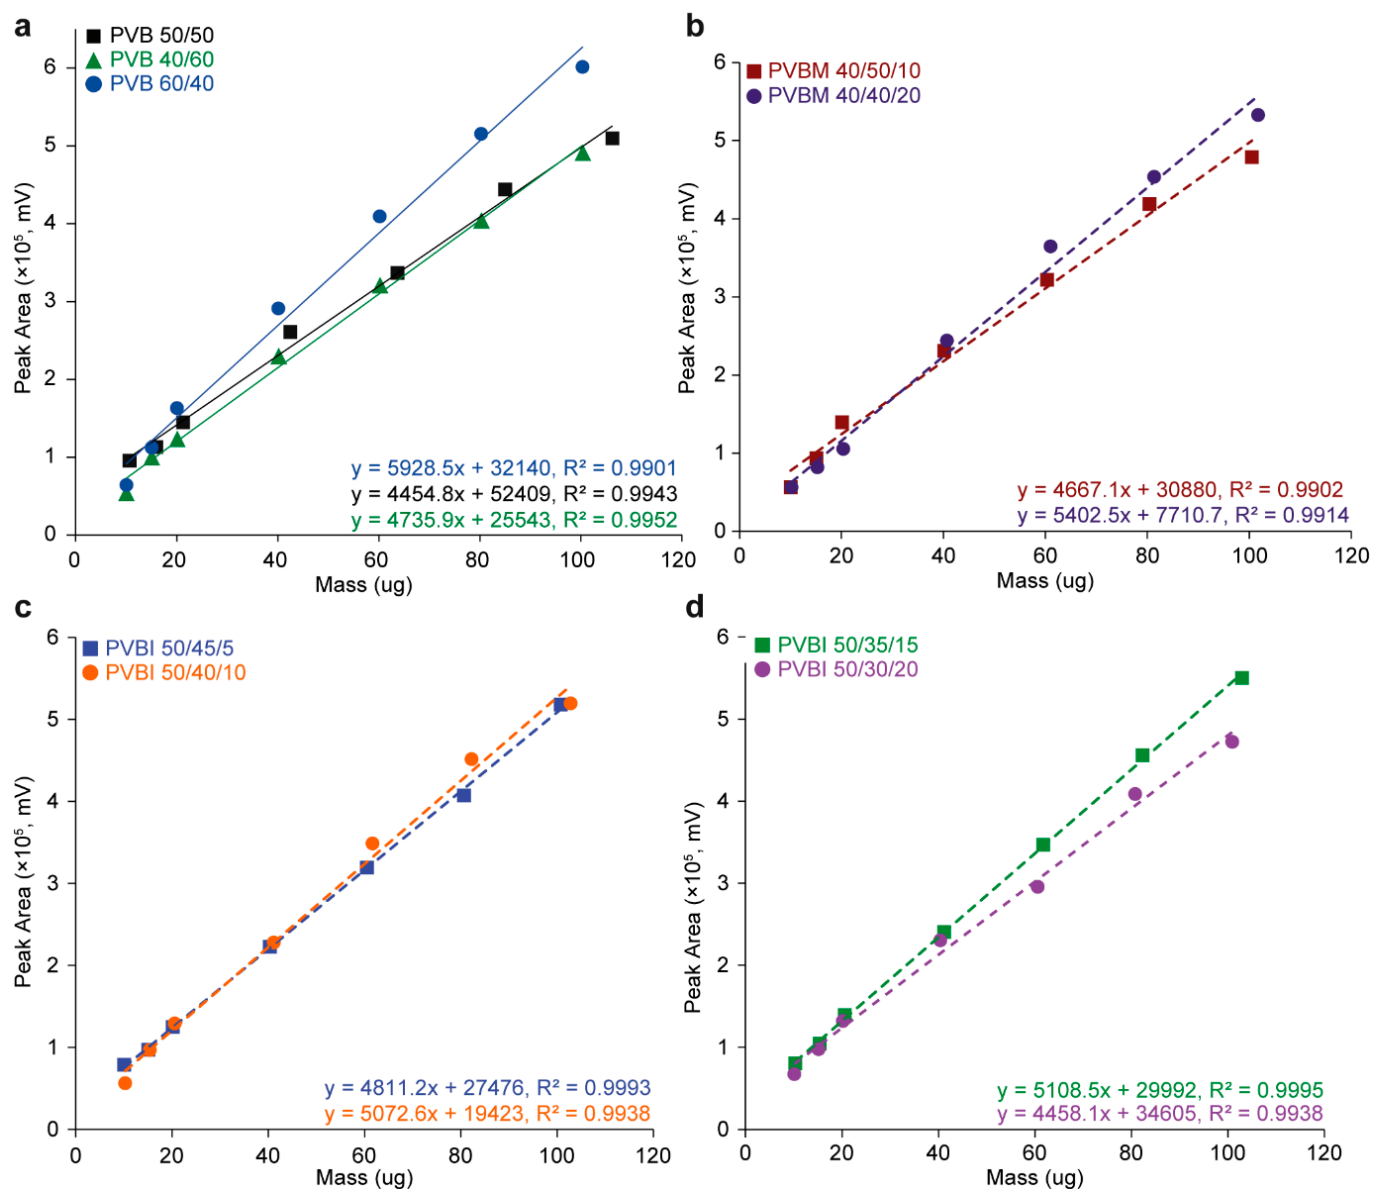

**Figure S5.** GPC calibration curves prepared for the copolymer series, from aqueous solutions of each copolymer (10 mg.mL<sup>-1</sup>, pH 1.0), injected at volumes between 10–100  $\mu\text{L}$ .

**Table S1.** Summary of copolymer solubilities as determined via GPC.

| Copolymer Code | Solubility (mg.mL <sup>-1</sup> ) <sup>a</sup> |               |               |
|----------------|------------------------------------------------|---------------|---------------|
|                | pH 1.0                                         | pH 1.5        | pH 2.0        |
| PVB 50/50      | 7.2 $\pm$ 0.5                                  | 7.5 $\pm$ 1.4 | 2.3 $\pm$ 0.5 |
| PVB 60/40      | 10.9 $\pm$ 1.0                                 | 9.8 $\pm$ 1.2 | 4.3 $\pm$ 0.3 |
| PVB 40/60      | 8.6 $\pm$ 0.5                                  | 7.1 $\pm$ 0.3 | 3.5 $\pm$ 0.2 |
| PVBM 40/50/10  | 6.5 $\pm$ 0.2                                  | 5.4 $\pm$ 0.6 | 2.3 $\pm$ 0.1 |
| PVBM 40/40/20  | 6.1 $\pm$ 0.4                                  | 5.6 $\pm$ 0.3 | 2.1 $\pm$ 0.1 |
| PVBI 50/45/5   | 10.4 $\pm$ 0.2                                 | 6.3 $\pm$ 0.1 | 1.4 $\pm$ 0.1 |
| PVBI 50/40/10  | 9.9 $\pm$ 0.7                                  | 5.7 $\pm$ 0.2 | -             |
| PVBI 50/35/15  | 9.5 $\pm$ 0.7                                  | 4.9 $\pm$ 0.2 | -             |
| PVBI 50/30/20  | 10.5 $\pm$ 0.3                                 | 3.7 $\pm$ 0.4 | -             |

<sup>a</sup> Copolymer solubility reported as mean  $\pm$  std. dev. (n = 3).

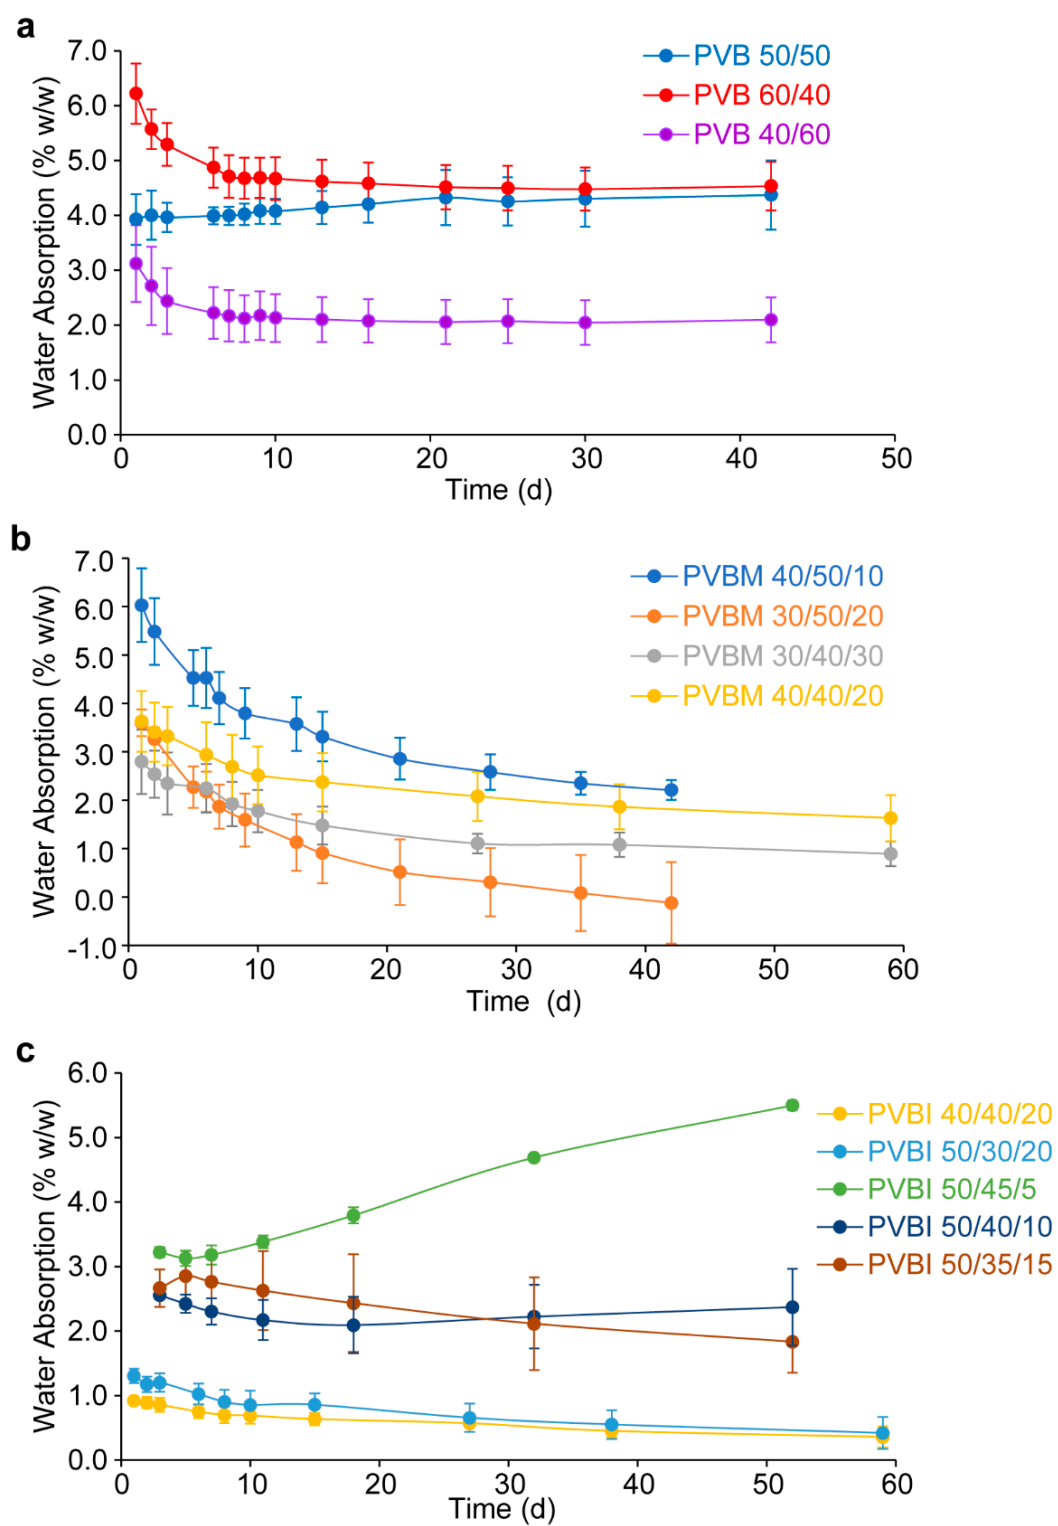

**Figure S6.** Summary of water absorption (% w/w) results for the copolymer series, following ~ 40–60 d immersion in PBS (pH 7.4, 37 °C). Values are reported as mean  $\pm$  std. dev. (n = 3).



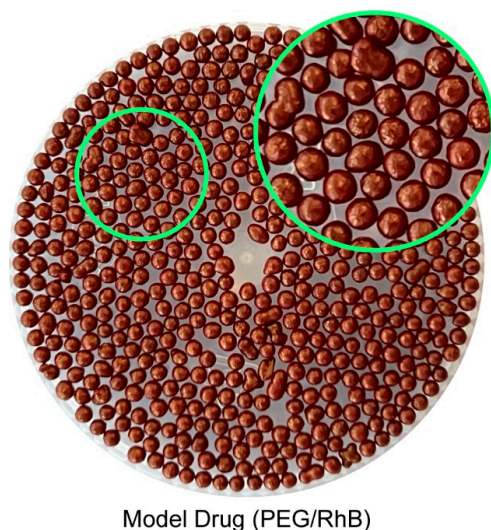

Model Drug (PEG/RhB)

**Figure S7.** Suglets® coated with the model drug formulation containing PEG and RhB, coated at a mass gain of 6.2% w/w.

**a**

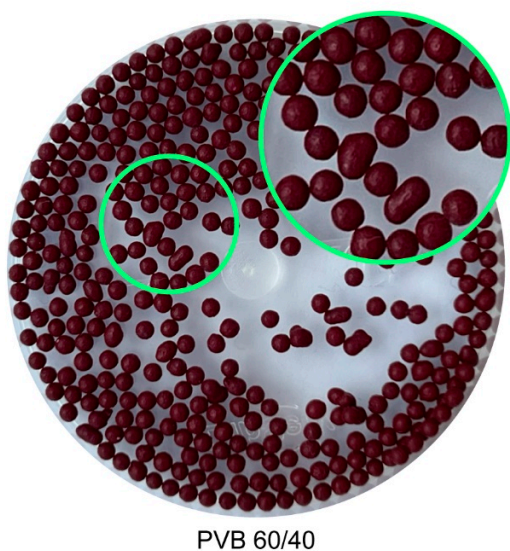

PVB 60/40

**b**

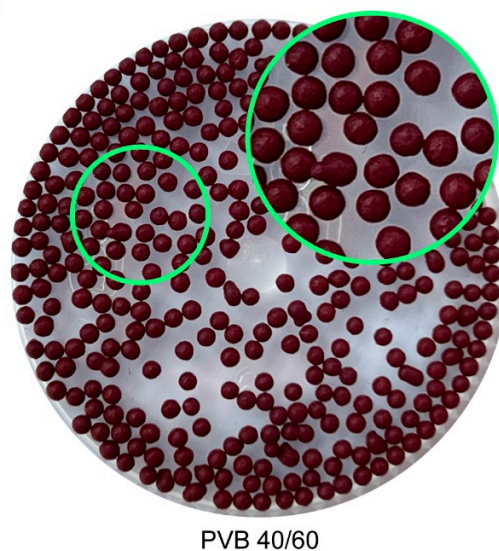

PVB 40/60

**c**

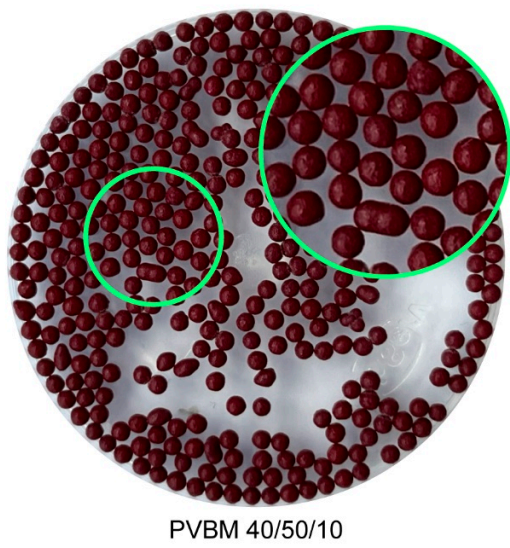

PVBM 40/50/10

**d**

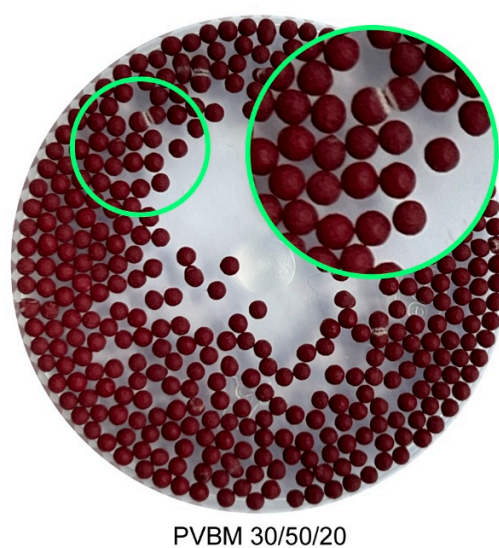

PVBM 30/50/20

**Figure S8.** Suglets® coated with a) PVB 60/40 (5.2% w/w mass gain), b) PVB 40/60 (5.4% w/w mass gain), c) PVBM 40/50/10 (6.5% w/w mass gain), and d) PVBM 30/50/20 (4.9% w/w mass gain), copolymer formulations.

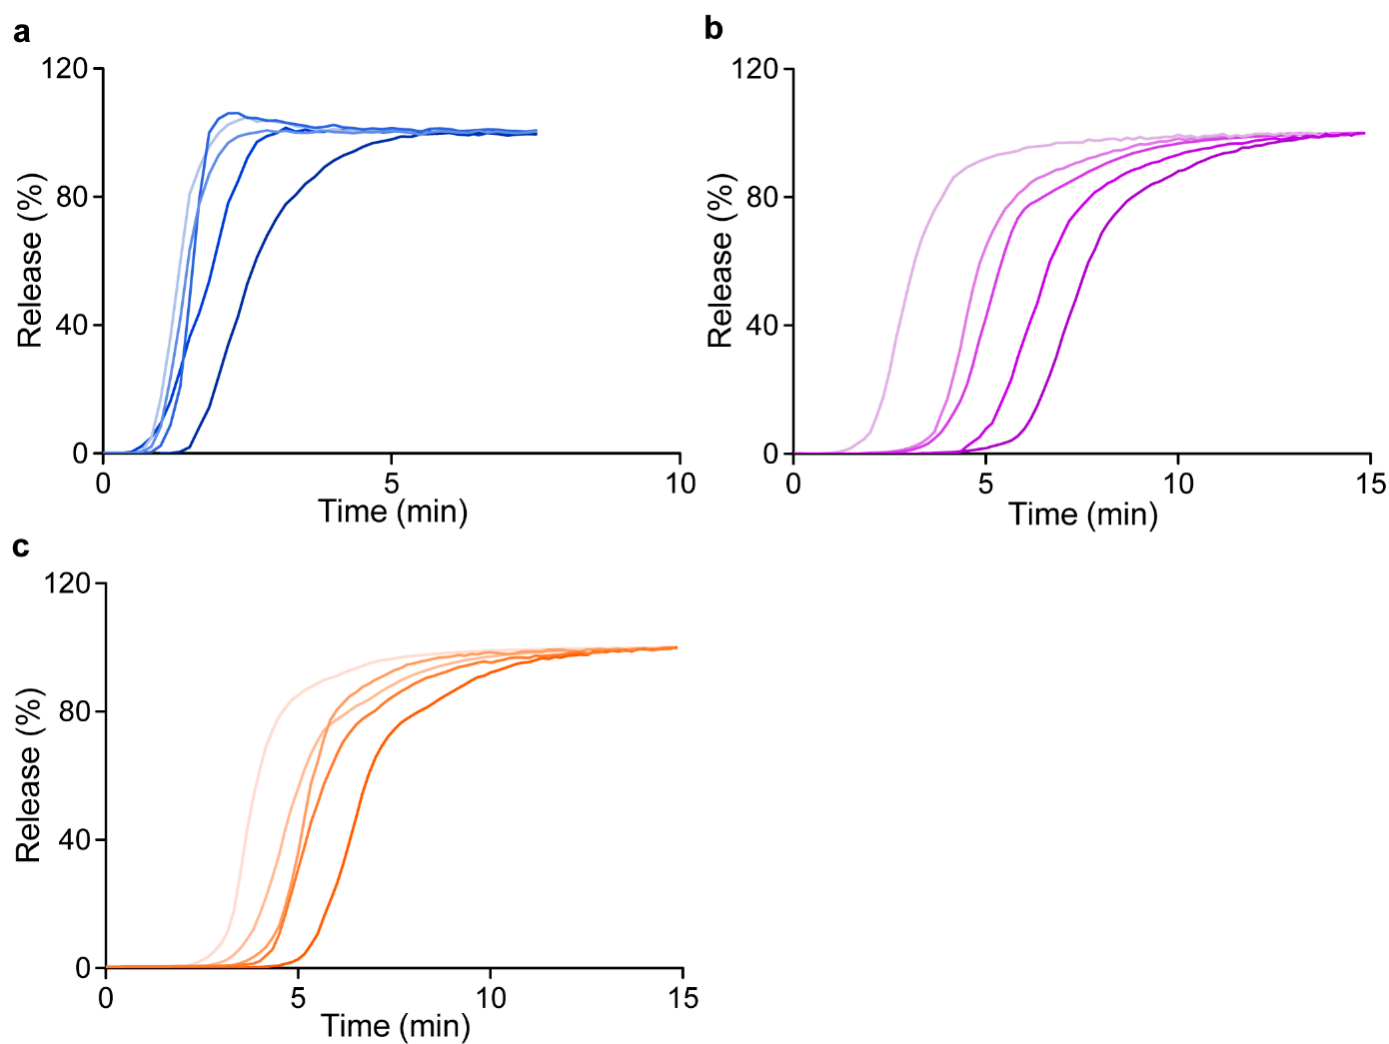

**Figure S9.** Release profiles obtained of Suglets® coated with a PEG/RhB model drug formulation (6.2% w/w mass gain), and a) PVB 60/40 (5.2% w/w mass gain), b) PVB 40/60 (5.4% w/w mass gain), and c) PVBM 40/50/10 (6.5% w/w mass gain), during dissolution in a pH 1.5 solution (37 °C), under stirring. Traces represent individual samples (n = 5), monitored via the absorbance maximum of rhodamine b ( $\lambda_{\text{max}} = 556 \text{ nm}$ ). Note that in a) two samples show a > 100% release peak maximum, which was caused by a local increase in dye concentration, due to a lag in stirring during analysis.
